# Supplementary material for: Fast-Track Programs in Total Hip and Knee Replacement at Swedish Hospitals—Influence on 2-Year Risk of Revision and Mortality
Source: MDPI journal article supplement (doi:10.3390/jcm10081680), 2021-04-14
Supplement: s1 [file s1]

**Supplementary data Table S1. Multivariable cox regression analysis of revision for any reason within 2 years after THR and TKR (HR with 95% CI)**

| Operation | Variable               | HR   | CI 95% |       |
|-----------|------------------------|------|--------|-------|
|           |                        |      | Lower  | Upper |
| THR       | Fast-track             | 1.19 | 1.03   | 1.39  |
|           | Female                 | 0.67 | 0.59   | 0.77  |
|           | Age                    | 1.02 | 1.01   | 1.03  |
|           | Year of operation      | 0.96 | 0.91   | 1.01  |
|           | BMI                    | 1.04 | 1.03   | 1.06  |
|           | ASA II                 | 1.45 | 1.19   | 1.76  |
|           | ASA III-IV             | 2.29 | 1.81   | 2.90  |
|           | Incision Posterior     | 0.96 | 0.84   | 1.10  |
|           | Incision Other         | 0.74 | 0.30   | 1.80  |
|           | Hybrid                 | 1.07 | 0.66   | 1.71  |
|           | Uncemented             | 2.72 | 2.26   | 3.27  |
|           | Reversed hybrid        | 1.89 | 1.55   | 2.32  |
| TKR       | Fast-track             | 0.91 | 0.79   | 1.06  |
|           | Female                 | 0.73 | 0.64   | 0.84  |
|           | Age                    | 0.99 | 0.98   | 1.00  |
|           | Year of operation      | 0.86 | 0.81   | 0.90  |
|           | BMI                    | 1.02 | 1.00   | 1.03  |
|           | ASA II                 | 1.23 | 1.00   | 1.51  |
|           | ASA III-V              | 1.96 | 1.54   | 2.50  |
|           | Uncemented             | 1.08 | 0.79   | 1.47  |
|           | No patella resurfacing | 0.94 | 0.62   | 1.43  |

For THR the non-fast-track care program, male sex, ASA I, direct lateral incision and cemented fixation were used as references. For TKR the care program non-fast-track, male sex, ASA I, cemented fixation and TKR without patellar resurfacing were used as references. THR: Total Hip Replacement; TKR: Total Knee Replacement; HR: Hazard Ratio; CI: Confidence Interval; BMI: Body Mass Index; ASA: American Society of Anesthesiologists.

**Supplementary data Table S2. Multivariable cox regression analysis of death within 2 years after THR and TKR (HR with 95% CI)**

| Operation | Variable           | HR   | CI 95% |       |
|-----------|--------------------|------|--------|-------|
|           |                    |      | Lower  | Upper |
| THR       | Fast-track         | 0.96 | 0.85   | 1.09  |
|           | Female             | 0.62 | 0.55   | 0.69  |
|           | Age                | 1.07 | 1.06   | 1.07  |
|           | Year of operation  | 0.95 | 0.91   | 0.99  |
|           | BMI                | 0.98 | 0.97   | 0.99  |
|           | ASA II             | 2.27 | 1.77   | 2.90  |
|           | ASA III-IV         | 5.26 | 4.07   | 6.81  |
|           | Incision Posterior | 0.66 | 0.25   | 1.77  |
|           | Incision Other     | 0.95 | 0.84   | 1.06  |
|           | Hybrid             | 1.07 | 0.77   | 1.48  |
|           | Uncemented         | 0.73 | 0.57   | 0.93  |
|           | Reversed hybrid    | 0.67 | 0.52   | 0.86  |
| TKR       | Fast-track         | 0.85 | 0.74   | 0.97  |
|           | Female             | 0.64 | 0.56   | 0.73  |
|           | Age                | 1.08 | 1.07   | 1.09  |
|           | Year of operation  | 0.97 | 0.92   | 1.02  |
|           | BMI                | 0.99 | 0.98   | 1.01  |
|           | ASA II             | 1.76 | 1.34   | 2.31  |
|           | ASA III-V          | 3.97 | 2.98   | 5.29  |

For THR the non-fast-track care program, male sex, ASA I, direct lateral incision and cemented fixation were used as references. For TKR the care program non-fast-track, male sex and ASA I was used as references. THR: Total Hip Replacement; TKR: Total Knee Replacement; HR: Hazard Ratio; CI: Confidence Interval; BMI: Body Mass Index; ASA: American Society of Anesthesiologists.

**Supplementary data Table S3. Mortality within 30 days, 90 days and 2 years after THR and TKR in different care programs 2011-2015**

|            | Variable, Definition    | Non-fast-track program | Fast-track program |
|------------|-------------------------|------------------------|--------------------|
| <b>THR</b> | Operations, n           | 25,520                 | 35,867             |
|            | Deaths < 30 days, n (%) | 34 (0.1)               | 37 (0.1)           |
|            | Deaths < 90 days, n (%) | 66 (0.3)               | 64 (0.2)           |
|            | Deaths < 2 years, n (%) | 564 (2.2)              | 674 (1.9)          |
| <b>TKR</b> | Operations, n           | 23,036                 | 31,686             |
|            | Deaths < 30 days, n (%) | 25 (0.1)               | 18 (0.1)           |
|            | Deaths < 90 days, n (%) | 53 (0.2)               | 42 (0.1)           |
|            | Deaths < 2 years, n (%) | 442 (1.9)              | 453 (1.4)          |

THR: Total hip replacement, TKR: Total knee replacement, n: number

**Supplementary data Table S4. Multivariable cox regression analysis of death within 90 days after THR and TKR (HR with 95% CI)**

| Operation | Variable           | HR   | CI 95% |       |
|-----------|--------------------|------|--------|-------|
|           |                    |      | Lower  | Upper |
| THR       | Fast-track         | 0.80 | 0.55   | 1.17  |
|           | Female             | 0.58 | 0.41   | 0.83  |
|           | Age                | 1.07 | 1.04   | 1.10  |
|           | Year of operation  | 0.99 | 0.87   | 1.13  |
|           | BMI                | 0.98 | 0.94   | 1.02  |
|           | ASA II             | 2.13 | 0.96   | 4.75  |
|           | ASA III-IV         | 6.88 | 3.03   | 15.6  |
|           | Incision Posterior | 0.80 | 0.56   | 1.15  |
|           | Incision Other     | 1.33 | 0.18   | 9.77  |
|           | Hybrid             | 0.54 | 0.13   | 2.19  |
|           | Uncemented         | 0.7  | 0.33   | 1.51  |
|           | Reversed hybrid    | 0.95 | 0.48   | 1.86  |
| TKR       | Fast-track         | 0.69 | 0.45   | 1.07  |
|           | Female             | 0.49 | 0.32   | 0.74  |
|           | Age                | 1.11 | 1.08   | 1.15  |
|           | Year of operation  | 0.95 | 0.82   | 1.11  |
|           | BMI                | 1    | 0.95   | 1.05  |
|           | ASA II             | 1.68 | 0.66   | 4.27  |
|           | ASA III-V          | 4.99 | 1.92   | 13.0  |

For THR the non-fast-track care program, male sex, ASA I, direct lateral incision and cemented fixation were used as references. For TKR the care program non-fast-track, male sex and ASA I was used as references. THR: Total Hip Replacement; TKR: Total Knee Replacement; HR: Hazard Ratio; CI: Confidence Interval; BMI: Body Mass Index; ASA: American Society of Anesthesiologists.
